# Supplementary material
Source: PubMed Central journal article supplement (PMC3656455)

## Supplemental Legends

### Table 1: GVHD clinical score.

Clinical GVHD scores at time point after allo-HCT (n=6-17 per group, pooled from 2 experiments). Mean values of clinical GVHD score  $\pm$  standard error of mean (SEM) are given. Differences in clinical GVHD scores between C3H.sw $\rightarrow$ B6 and C3H.sw $\rightarrow$  *Batf3*<sup>-/-</sup> groups were statistically evaluated using Mann-Whitney test. \*\*p<0.01.

### Table 2: GVHD Histopathological score on day 14.

B6WT and *Batf3*<sup>-/-</sup> animals received 10Gy on day -1 and 0.5x10<sup>6</sup> CD8<sup>+</sup>T cells along with 5x10<sup>6</sup> TCD-BM cells from either syngeneic B6 or allogeneic C3H.sw donors and analyzed histopathological GVHD scores of GI tract (small and large intestine and liver on day 14 (n=5-9 per group, pooled from 2 experiments). \*p<0.05, syngeneic B6 $\rightarrow$ B6 vs allogeneic C3H.sw $\rightarrow$ B6 and C3H.sw $\rightarrow$ *Batf3*<sup>-/-</sup> animals.

### Figure 1: Serum cytokines on day 14.

B6WT and *Batf3*<sup>-/-</sup> animals received 10Gy on day -1 and 0.5x10<sup>6</sup> CD8<sup>+</sup>T cells along with 5x10<sup>6</sup> TCD-BM cells from either syngeneic B6 or allogeneic C3H.sw donors. Serum levels of IFN- $\gamma$  (a) and IL-17A (b) on day 21 (n=4-7 per group, pooled from 2 experiments). (The bars represent mean  $\pm$  standard deviation. N.S denotes no significant differences.

**Figure 2: Spleen DCs from *Batf3*<sup>-/-</sup> animals show impaired cross-presentation.**

CD8<sup>+</sup> T cell proliferation. (a) Representative figure of CFSE-labeled splenic CD8<sup>+</sup> T cells from B6 mice were incubated with spleen CD11c<sup>+</sup> DCs from either B6 (left) or *Batf3*<sup>-/-</sup> (right) animals and irradiated class I<sup>-/-</sup> splenocytes and MBL-2 tumor lysate for 4 days. (b) The proliferation of CD8<sup>+</sup> T cells stimulated by *Batf3*<sup>-/-</sup> DCs were significantly decreased (n=3). Data are representative of two independent experiments and bars represent as the mean ± standard deviation. (c) Representative figure of spleen CD11c<sup>+</sup>CD8<sup>+</sup>DCs. (right) WT, (middle) *Batf3*<sup>-/-</sup> (6x backcrossed), (left) *Batf3*<sup>-/-</sup> (10xbackcrossed). The number showed the percentage of CD8<sup>+</sup>DCs in total CD11c<sup>+</sup>DCs population. (d) The summary of the percentage of spleen CD11c<sup>+</sup>CD8<sup>+</sup>DCs in WT, *Batf3*<sup>-/-</sup> (6x backcrossed) and *Batf3*<sup>-/-</sup> (10xbackcrossed) animals.

**Figure 3: TLR3 expression on host hematopoietic APCs are critical for GvT**

In order to test GvT responses, both B6 WT and *Tlr3*<sup>-/-</sup> animals received 10Gy on day -1 and 0.5x10<sup>6</sup> CD8<sup>+</sup> T cells along with 5x10<sup>6</sup> TCD-BM from either syngeneic B6 or allogeneic MHC match, miHA mismatched C3H.sw donors and added syngeneic syngeneic 2x10<sup>4</sup> MBL-2 tumor cells at the time of BMT. (a) Combined tumor mortality data from two independent experiments showed. n=6-11 per group. p=0.01 when allo-B6 WT animals compared with allo-*Tlr3*<sup>-/-</sup> animals. To examine that the impact of TLR3 deficiency only on host APC without other confounding effects, we firstly generated [WT-B6→B6 Ly5.2] and [*Tlr3*<sup>-/-</sup> B6→ B6 Ly5.2] chimeras. After four months later, these animals were used as recipients in MHC matched, multiple minor mismatched allo-BMT. They received 9Gy and 0.5x10<sup>6</sup> CD8<sup>+</sup> T cells along with 5x10<sup>6</sup> TCD-BM from either syngeneic B6 or allogeneic C3H.sw donors. (b) Clinical GVHD score (n=5-12 per group, pooled from 2 experiments). N.S means not significant differences. (c.d) Serum levels of

IFN- $\gamma$  (c) and IL-17A (d) on day 14 after allo-BMT (n=6-12 per group, pooled from 2 experiments). (e) Photon flux/animal. [*Tlr3*<sup>-/-</sup> B6 $\rightarrow$  B6 Ly5.2] animals showed high luciferase activity on day 28 after allo-BMT. \* p<0.05, allo [WT-B6 $\rightarrow$ B6 Ly5.2] vs allo [*Tlr3*<sup>-/-</sup> B6 $\rightarrow$  B6 Ly5.2]. Data are representative of two independent experiments.

**Figure 4: Stimulation of TLR3 on host hematopoietic APCs enhances GvT**

BMT and tumor induction were performed in the [WT-B6 $\rightarrow$ B6Ly5.2] and [*Tlr3*<sup>-/-</sup>B6 $\rightarrow$ B6Ly5.2] animals as in Methods. The recipient animals received TLR3 stimulant poly IC or the diluent control and analyzed for GvHD and tumor free survival. Photon flux/animal. [WT-B6 $\rightarrow$  B6 Ly5.2] animals with poly I:C showed less luciferase activity after allo-BMT. \*p<0.05, allo [WT-B6 $\rightarrow$ B6 Ly5.2] with polyI:C vs allo[WT-B6 $\rightarrow$ B6] with PBS and allo[*Tlr3*<sup>-/-</sup> B6 $\rightarrow$  B6 Ly5.2] with PBS.

**Supplemental Tables 1:** Clinical scores of GVHD Severity are similar in *Batf3*<sup>-/-</sup> and WT recipients.

| Day | C3H.sw→B6        | C3H.sw→ <i>Batf3</i> <sup>-/-</sup> | P value   |
|-----|------------------|-------------------------------------|-----------|
| 7   | 2.18±0.22 (n=11) | 2±0.24 (n=17)                       | P=0.44    |
| 14  | 1.86±0.29 (n=11) | 1.25±0.16 (n=16)                    | P=0.06    |
| 21  | 3.32±0.48 (n=11) | 1.81±0.22 (n=16)                    | P=0.005** |
| 28  | 3.33±0.36 (n=9)  | 2.47±0.33 (n=15)                    | P=0.11    |
| 35  | 4.07±0.68 (n=7)  | 2.54±0.43 (n=14)                    | P=0.08    |
| 42  | 3.58±0.80 (n=6)  | 2.69±0.46 (n=13)                    | P=0.37    |
| 49  | 4.00±0.91 (n=5)  | 2.25±0.52 (n=10)                    | P=0.09    |
| 56  | 3.00±0.58 (n=4)  | 1.89±0.38 (n=9)                     | P=0.10    |
| 63  | 2.75±0.43 (n=4)  | 2.00±0.35 (n=9)                     | P=0.18    |
| 70  | 2.63±0.38 (n=4)  | 2.06±0.29 (n=9)                     | P=0.34    |

**Supplemental Table 2:** Histopathological scores are similar in *Batf3*<sup>-/-</sup> and WT animals

| GVHD model                                | GI tract scores | Liver scores |         |
|-------------------------------------------|-----------------|--------------|---------|
| B6→B6 (n=6)                               | 7.7±1.8*        | 8.3±1.8*     |         |
| C3H.sw→B6 (n=9)                           | 20.0±3.3        | 16.8±1.6     |         |
| C3H.sw→ <i>Batf3</i> <sup>-/-</sup> (n=9) | 22.0±1.9        | 20.9±1.4     | *p<0.05 |

Supplemental figure 1

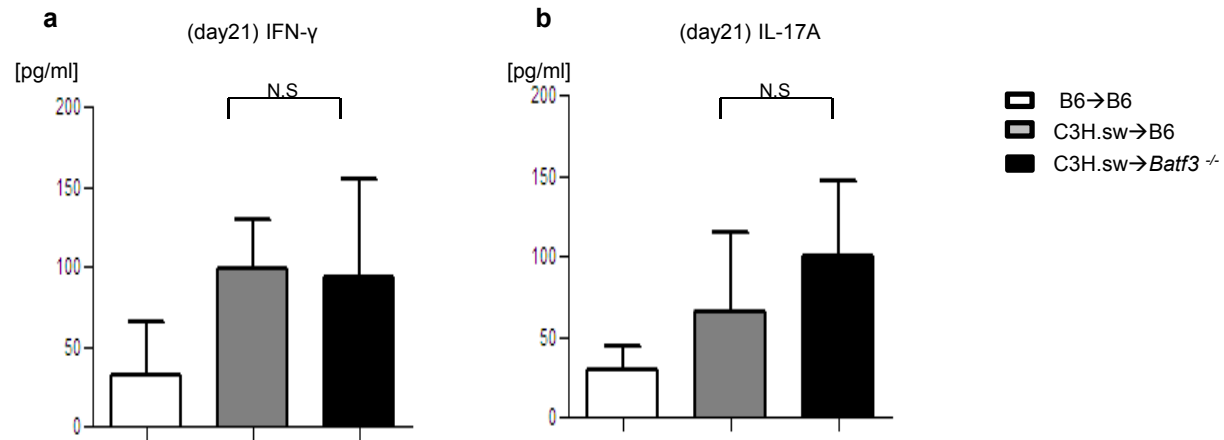

# Supplemental figure 2

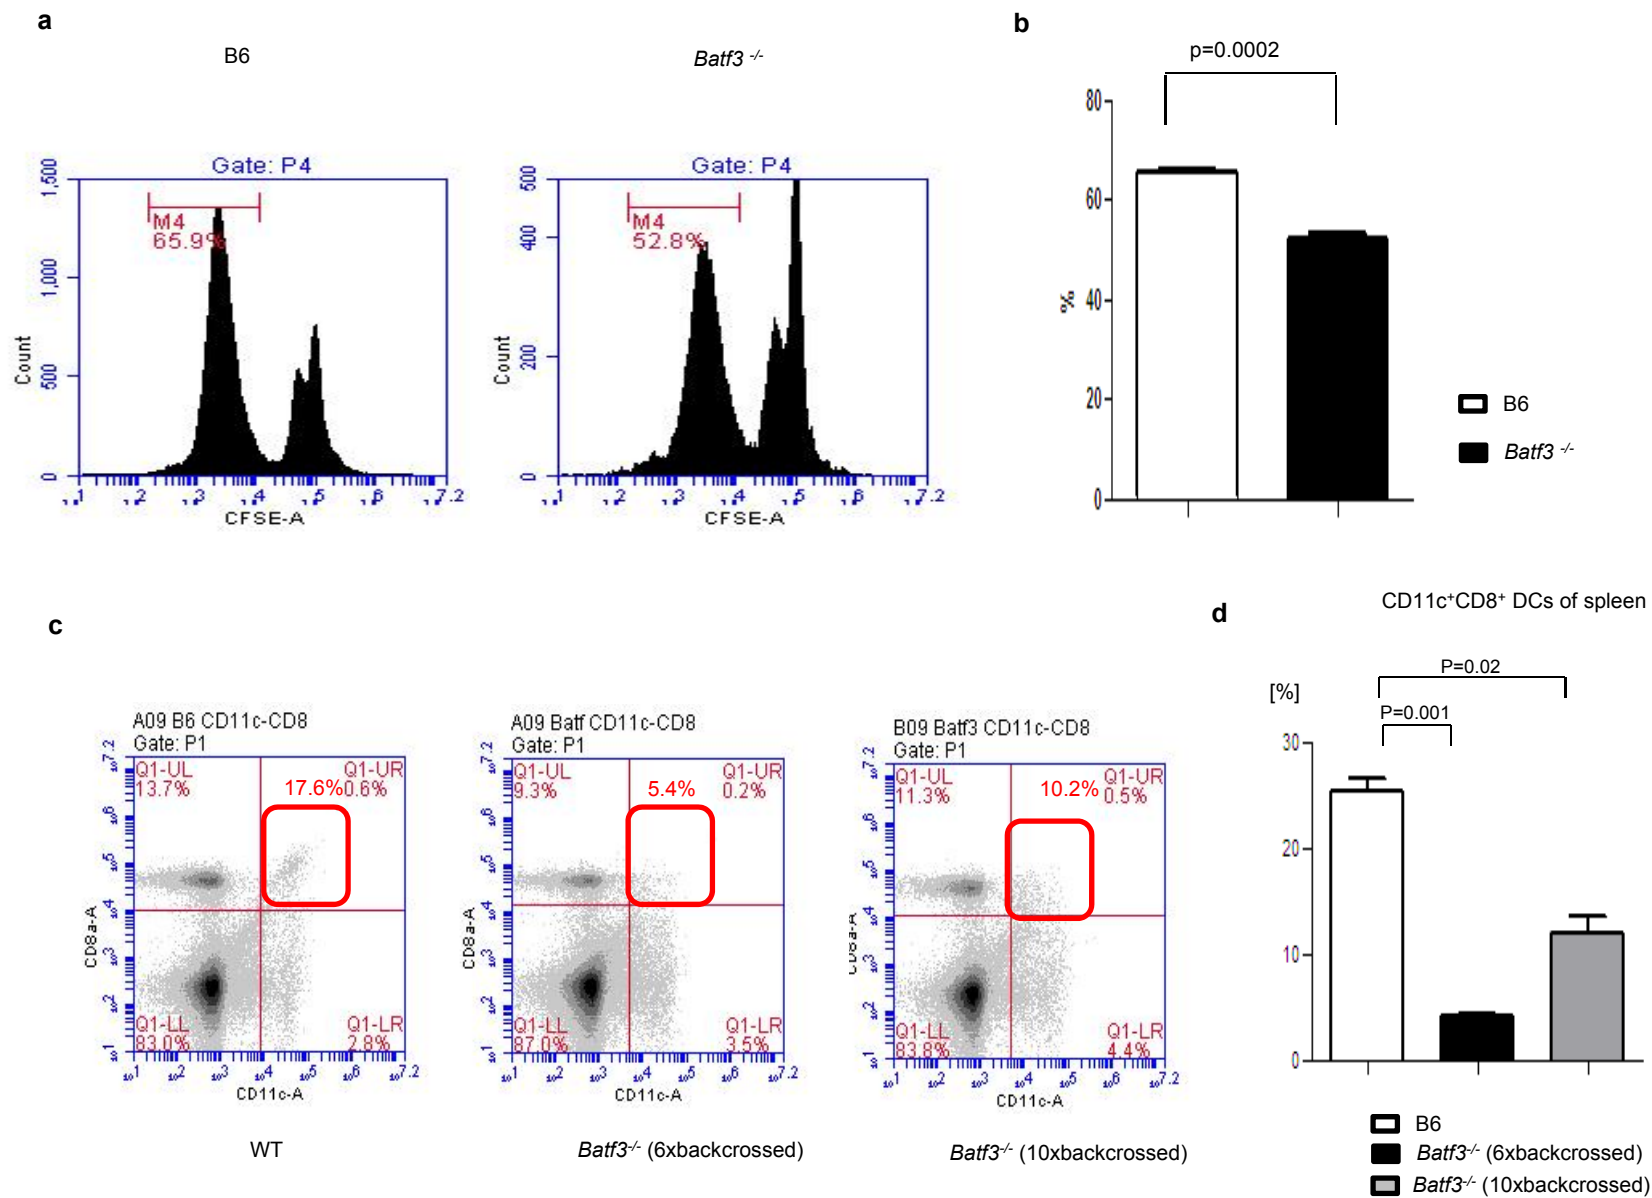

# Supplemental Figure 3

**a**

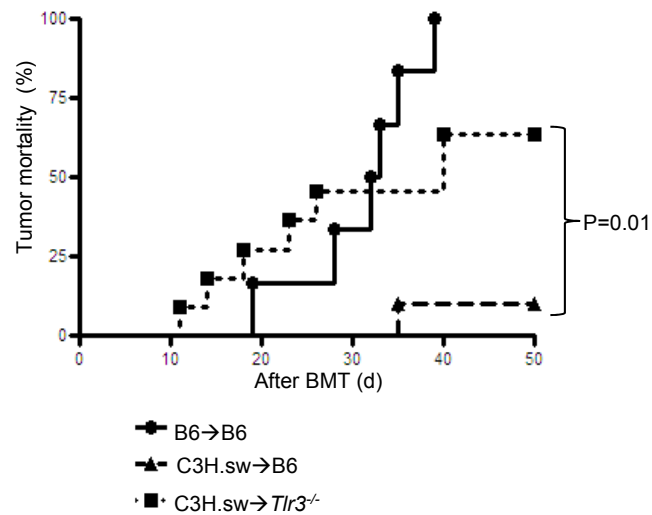

**b**

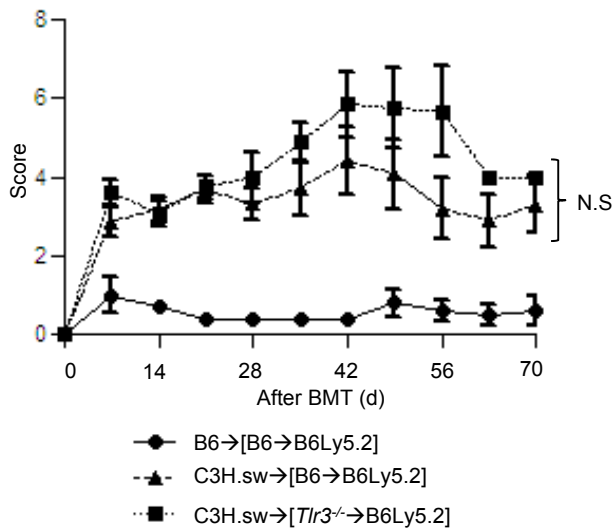

**c**

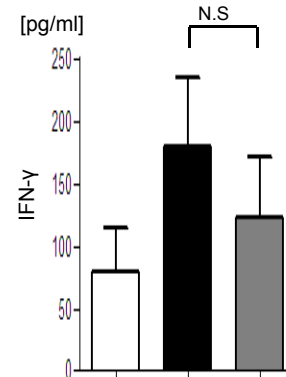

**d**

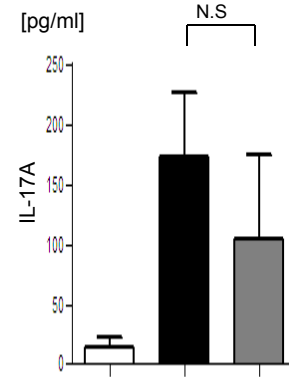

**e**

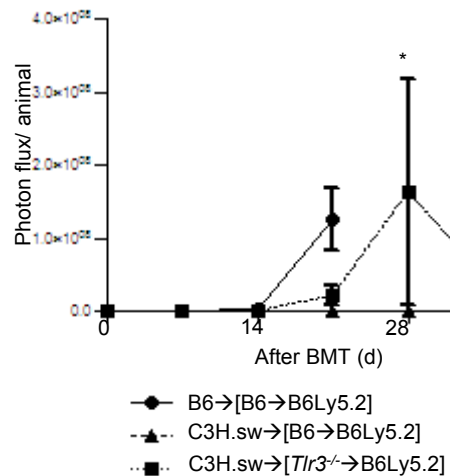



Supplemental Figure 4

**a**

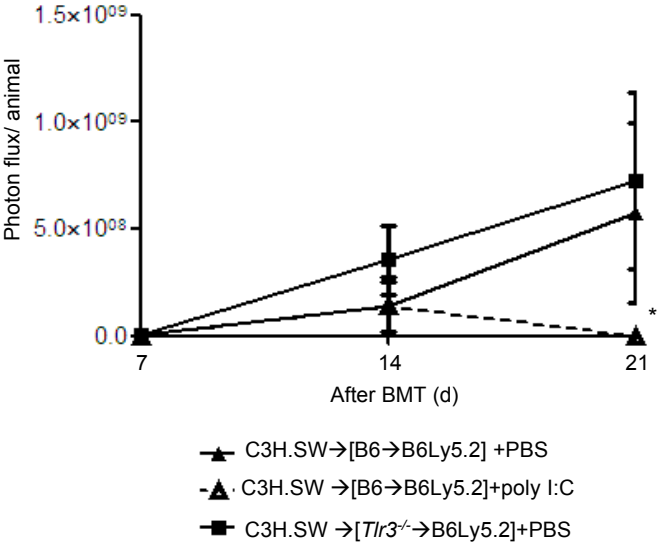

Supplement: supp_blood-2012-05-432872_blood-2012-05-432872-1.pdf [file supp_blood-2012-05-432872_blood-2012-05-432872-1.pdf]
